# Supplementary material for: Design principles for anode stable solid-state electrolytes
Source: Royal Society of Chemistry journal article supplement (doi:10.1039/d4ta02269f), 2024-01-01
Supplement: d4ta02269f1.pdf [file d4ta02269f1.pdf]

## Supplementary Information

### Design principle for anode stable solid-state electrolytes

Tan-Lien Pham<sup>1</sup>, Lin Wang<sup>1</sup>, Bin Ouyang<sup>1,\*</sup>

<sup>1</sup>Department of Chemistry and Biochemistry, Florida State University, Tallahassee, FL 32304, USA

\*E-mail: bo22b@fsu.edu

#### Supporting note 1. Screened compositional spaces:

To enumerate all possible Li(Na) metal oxide perovskites (Li(Na)-PRX) with prototype formula being  $\text{Li}_x(\text{A, Vac})_{1-x}(\text{M}_1\text{M}_2)_1\text{O}_3$ , where A and  $\text{M}_1$ ,  $\text{M}_2$  are cations of different sizes. We focus on a subset of the broader perovskite family where these A sites, including mixture of  $\text{Li}^+$  with  $\text{Na}^+$ ,  $\text{K}^+$ ,  $\text{Rb}^+$ ,  $\text{Cs}^+$ ,  $\text{Mg}^{2+}$ ,  $\text{Ca}^{2+}$ ,  $\text{Sr}^{2+}$ ,  $\text{Ba}^{2+}$ ,  $\text{Pb}^{2+}$ ,  $\text{Sc}^{3+}$ ,  $\text{In}^{3+}$ ,  $\text{Y}^{3+}$ ,  $\text{La}^{3+}$ ,  $\text{Pr}^{3+}$ ,  $\text{Nd}^{3+}$ ,  $\text{Sm}^{3+}$ ,  $\text{Gd}^{3+}$ ,  $\text{Er}^{3+}$ ,  $\text{Eu}^{3+}$ ,  $\text{Dy}^{3+}$ , represent a screening of alkali and alkaline earth metals, as well as some lanthanides and transition metals, offering a range of ionic radii and charge states to tune the properties of the perovskite. The  $\text{M}_1$ ,  $\text{M}_2$  species, which include  $\text{Mg}^{2+}$ ,  $\text{Zn}^{2+}$ ,  $\text{Ca}^{2+}$ ,  $\text{Sc}^{3+}$ ,  $\text{In}^{3+}$ ,  $\text{Ga}^{3+}$ ,  $\text{Al}^{3+}$ ,  $\text{Ge}^{4+}$ ,  $\text{Ti}^{4+}$ ,  $\text{Sn}^{4+}$ ,  $\text{Zr}^{4+}$ ,  $\text{Hf}^{4+}$ ,  $\text{Nb}^{5+}$ ,  $\text{Sb}^{5+}$ ,  $\text{Ta}^{5+}$ ,  $\text{Mo}^{6+}$ ,  $\text{W}^{6+}$ ,  $\text{Te}^{6+}$ , are primarily transition metals and metalloids. These elements typically have smaller ionic radii compared to the A species and occupy the octahedral sites in the perovskite structure. The overall structure of Li(Na) disordered rocksalt-type metal oxides (Li(Na)-DRX) materials with the prototype formula of Li being  $\text{Li}_{1+x+\delta}(\text{M}_1\text{M}_2)_{1-x}\text{O}_2$  is derived from the perovskite architecture by the choice of cations and the stoichiometry. For Li(Na) metal halides (Li(Na)-MH), we consider the following metal species M:  $\text{Mg}^{2+}$ ,  $\text{Ca}^{2+}$ ,  $\text{Zn}^{2+}$ ,  $\text{La}^{3+}$ ,  $\text{Al}^{3+}$ ,  $\text{Ga}^{3+}$ ,  $\text{In}^{3+}$ ,  $\text{Sc}^{3+}$ ,  $\text{Y}^{3+}$ ,  $\text{Ge}^{4+}$ ,  $\text{Hf}^{4+}$ ,  $\text{Zr}^{4+}$ ,  $\text{Ti}^{4+}$ ,  $\text{Sn}^{4+}$ ,  $\text{Nb}^{5+}$ ,  $\text{Ta}^{5+}$ ,  $\text{Sb}^{5+}$ . Overall, we have examined of 16,644 compositions across three typical structures: 3,846 compositions for Li(Na)-PRX, 1,238 compositions for Li(Na)-DRX and 11,560 compositions for Li(Na)-MH, respectively.

**Table S1.** The chemical potentials for all elements in facets of phase diagram for Li-Zn-O and Na-Zn-O systems.

| Facets                                                                                                | $\mu_{Li/Na}$ (eV/atom) | $\mu_{Zn}$ (eV/atom) | $\mu_O$ (eV/atom) |
|-------------------------------------------------------------------------------------------------------|-------------------------|----------------------|-------------------|
| Li <sub>10</sub> Zn <sub>4</sub> O <sub>9</sub> -Li <sub>6</sub> ZnO <sub>4</sub> -Zn                 | -3.220                  | -1.260               | -8.582            |
| Li <sub>6</sub> ZnO <sub>4</sub> -Li <sub>2</sub> O-Zn                                                | -3.078                  | -1.260               | -8.794            |
| Li <sub>2</sub> O-Zn-LiZn <sub>3</sub>                                                                | -2.593                  | -1.260               | -9.764            |
| Li <sub>2</sub> O-LiZn <sub>3</sub> -LiZn                                                             | -2.223                  | -1.383               | -10.505           |
| Li <sub>2</sub> O-LiZn-Li                                                                             | -1.909                  | -1.697               | -11.132           |
| Na <sub>10</sub> Zn <sub>4</sub> O <sub>9</sub> -Na <sub>6</sub> ZnO <sub>4</sub> -NaZn <sub>13</sub> | -1.579                  | -1.298               | -8.821            |
| Na <sub>6</sub> ZnO <sub>4</sub> -Na <sub>2</sub> O-NaZn <sub>13</sub>                                | -1.444                  | -1.308               | -9.021            |
| Na <sub>2</sub> O-NaZn <sub>13</sub> -Na                                                              | -1.323                  | -1.318               | -9.264            |

**Table S2.** The formation energy of competing phases in phase diagram of Li-Zn-O and Na-Zn-O.

| Competing phases                                | Formation energy<br>(eV/atom) | Competing phases                                | Formation energy<br>(eV/atom) |
|-------------------------------------------------|-------------------------------|-------------------------------------------------|-------------------------------|
| Li <sub>10</sub> Zn <sub>4</sub> O <sub>9</sub> | -1.992                        | Na <sub>10</sub> Zn <sub>4</sub> O <sub>9</sub> | -1.634                        |
| Li <sub>6</sub> ZnO <sub>4</sub>                | -2.036                        | Na <sub>6</sub> ZnO <sub>4</sub>                | -1.552                        |
| Li <sub>2</sub> O                               | -2.062                        | Na <sub>2</sub> O                               | -1.439                        |
| LiZn <sub>3</sub>                               | -0.171                        | NaZn <sub>13</sub>                              | -0.054                        |
| LiZn                                            | -0.219                        |                                                 |                               |

**Table S3.** The chemical potentials for all elements in facets of phase diagram for Li-Sb-Br and Na-Sb-Br.

| Facets                                       | $\mu_{Li/Na}$ (eV/atom) | $\mu_{Sb}$ (eV/atom) | $\mu_{Br}$ (eV/atom) |
|----------------------------------------------|-------------------------|----------------------|----------------------|
| Sb-LiBr-Li <sub>2</sub> Sb                   | -2.865                  | -4.129               | -4.353               |
| Li <sub>3</sub> Sb -LiBr -Li <sub>2</sub> Sb | -2.717                  | -4.425               | -4.501               |
| Li <sub>3</sub> Sb-LiBr-Li                   | -1.909                  | -6.849               | -5.355               |
| Sb-NaBr-NaSb                                 | -2.160                  | -4.129               | -4.489               |
| NaSb-NaBr-Na <sub>3</sub> Sb                 | -1.856                  | -4.433               | -4.793               |
| Na <sub>3</sub> Sb-NaBr-Na                   | -1.326                  | -6.034               | -5.326               |
